# Supplementary material for: Assessment of the Adherence to ESPGHAN 2018 Guidelines in the Neonatal Intensive Care Unit of the Ghent University Hospital: A Retrospective Study
Source: MDPI journal article supplement (doi:10.3390/nu15102324), 2023-05-16
Supplement: s1 [file s1]

**Table S6.** Energy provision in neonates stratified by birth weight (BW). Intake data (in kcal/kg/d) show mean and standard deviation.

| Day | BW < 1000 g |              | BW of 1000 to < 1500 g |              | BW ≥ 1500 g |              |
|-----|-------------|--------------|------------------------|--------------|-------------|--------------|
|     | N           | kcal/kg/d    | N                      | kcal/kg/d    | N           | kcal/kg/d    |
| 1   | 28          | 22.8 ± 11.3  | 12                     | 23.7 ± 19.4  | 46          | 43.6 ± 23.4  |
| 2   | 28          | 43.7 ± 10.2  | 12                     | 47.9 ± 22.3  | 45          | 58.1 ± 15.2  |
| 3   | 28          | 55.2 ± 16.2  | 12                     | 61.0 ± 22.0  | 41          | 73.6 ± 10.0  |
| 4   | 28          | 68.7 ± 16.5  | 12                     | 83.8 ± 32.4  | 43          | 85.5 ± 13.1  |
| 5   | 28          | 78.7 ± 17.0  | 12                     | 95.6 ± 19.3  | 45          | 91.5 ± 17.8  |
| 6   | 28          | 76.3 ± 16.1  | 12                     | 97.3 ± 19.8  | 43          | 100.6 ± 16.1 |
| 7   | 28          | 77.5 ± 21.1  | 12                     | 100.5 ± 20.3 | 39          | 95.4 ± 18.9  |
| 8   | 28          | 80.0 ± 19.2  | 12                     | 103.4 ± 21.1 | 33          | 99.5 ± 19.5  |
| 9   | 28          | 81.3 ± 18.9  | 11                     | 107.0 ± 20.9 | 28          | 102.5 ± 14.5 |
| 10  | 28          | 82.2 ± 26.6  | 11                     | 103.6 ± 19.2 | 26          | 99.9 ± 16.6  |
| 11  | 28          | 85.6 ± 24.1  | 11                     | 106.6 ± 13.6 | 25          | 97.2 ± 16.5  |
| 12  | 28          | 85.2 ± 23.9  | 10                     | 103.3 ± 23.3 | 21          | 100 ± 18.8   |
| 13  | 27          | 88.8 ± 20.2  | 7                      | 100.2 ± 20.5 | 18          | 101 ± 12.9   |
| 14  | 27          | 91.2 ± 20.4  | 6                      | 100.2 ± 23.5 | 17          | 101.7 ± 7.8  |
| 15  | 23          | 89.1 ± 23.3  | 5                      | 99.6 ± 25.3  | 10          | 98.2 ± 9.5   |
| 16  | 22          | 92.3 ± 22.9  | 3                      | 98.6 ± 34.5  | 9           | 99.8 ± 11.7  |
| 17  | 19          | 92.2 ± 23.7  | 3                      | 99.6 ± 37.6  | 4           | 97.3 ± 10.8  |
| 18  | 18          | 90.5 ± 18.4  | -                      | -            | 3           | 103.7 ± 9.8  |
| 19  | 18          | 92.7 ± 19.8  | -                      | -            | 3           | 99.7 ± 12.7  |
| 20  | 17          | 96.5 ± 22.0  | -                      | -            | -           | -            |
| 21  | 17          | 103.6 ± 17.7 | -                      | -            | -           | -            |
| 22  | 15          | 101.8 ± 27.7 | -                      | -            | -           | -            |
| 23  | 15          | 102.6 ± 18.4 | -                      | -            | -           | -            |
| 24  | 14          | 97.8 ± 14.8  | -                      | -            | -           | -            |
| 25  | 13          | 96.2 ± 18.7  | -                      | -            | -           | -            |
| 26  | 13          | 100.0 ± 16.3 | -                      | -            | -           | -            |
| 27  | 12          | 101.0 ± 16.1 | -                      | -            | -           | -            |
| 28  | 12          | 100.6 ± 14.8 | -                      | -            | -           | -            |
