# Supplementary material for: Assessment of the Adherence to ESPGHAN 2018 Guidelines in the Neonatal Intensive Care Unit of the Ghent University Hospital: A Retrospective Study
Source: MDPI journal article supplement (doi:10.3390/nu15102324), 2023-05-16
Supplement: s1 [file s1]

**Table S4.** Lipid provision in neonates stratified by birth weight (BW). Intake data (in g/kg/d) show mean and standard deviation.

| Day | BW < 1000 g |           | BW of 1000 to < 1500 g |           | BW ≥ 1500 g |           |
|-----|-------------|-----------|------------------------|-----------|-------------|-----------|
|     | N           | g/kg/d    | N                      | g/kg/d    | N           | g/kg/d    |
| 1   | 28          | 0.0 ± 0.0 | 12                     | 0.3 ± 0.7 | 46          | 0.7 ± 1.0 |
| 2   | 28          | 0.7 ± 0.5 | 12                     | 1.1 ± 1.3 | 45          | 1.8 ± 0.9 |
| 3   | 28          | 1.5 ± 0.7 | 12                     | 2.2 ± 1.3 | 41          | 2.8 ± 0.7 |
| 4   | 28          | 2.3 ± 1.0 | 12                     | 3.7 ± 1.8 | 43          | 3.7 ± 1.0 |
| 5   | 28          | 2.9 ± 1.1 | 12                     | 4.4 ± 1.1 | 45          | 4.1 ± 1.4 |
| 6   | 28          | 2.6 ± 1.1 | 12                     | 4.6 ± 1.2 | 43          | 4.7 ± 1.3 |
| 7   | 28          | 2.5 ± 1.5 | 12                     | 4.8 ± 1.2 | 39          | 4.5 ± 1.3 |
| 8   | 28          | 2.7 ± 1.6 | 12                     | 5.2 ± 1.3 | 33          | 4.8 ± 1.6 |
| 9   | 28          | 3.1 ± 1.5 | 11                     | 5.6 ± 1.5 | 28          | 5.2 ± 1.4 |
| 10  | 28          | 2.9 ± 1.9 | 11                     | 4.5 ± 0.8 | 26          | 4.7 ± 1.8 |
| 11  | 28          | 4.7 ± 6.6 | 11                     | 4.8 ± 0.9 | 25          | 4.3 ± 1.5 |
| 12  | 28          | 3.5 ± 1.7 | 10                     | 4.2 ± 0.9 | 21          | 4.5 ± 1.4 |
| 13  | 27          | 3.4 ± 1.4 | 7                      | 4.3 ± 1.0 | 18          | 4.7 ± 1.1 |
| 14  | 27          | 3.5 ± 1.5 | 6                      | 4.3 ± 1.0 | 17          | 4.7 ± 1.0 |
| 15  | 23          | 3.4 ± 1.6 | 5                      | 4.5 ± 1.3 | 10          | 4.5 ± 0.9 |
| 16  | 22          | 3.6 ± 1.5 | 3                      | 4.6 ± 1.8 | 9           | 4.4 ± 0.9 |
| 17  | 19          | 3.6 ± 1.6 | 3                      | 4.9 ± 2.1 | 4           | 4.1 ± 0.8 |
| 18  | 18          | 3.7 ± 1.5 | -                      | -         | 3           | 4.8 ± 0.7 |
| 19  | 18          | 4.0 ± 1.5 | -                      | -         | 3           | 5.0 ± 0.8 |
| 20  | 17          | 4.0 ± 1.6 | -                      | -         | -           | -         |
| 21  | 17          | 4.2 ± 1.4 | -                      | -         | -           | -         |
| 22  | 15          | 3.8 ± 1.5 | -                      | -         | -           | -         |
| 23  | 15          | 4.2 ± 1.5 | -                      | -         | -           | -         |
| 24  | 14          | 3.9 ± 1.5 | -                      | -         | -           | -         |
| 25  | 13          | 3.8 ± 1.7 | -                      | -         | -           | -         |
| 26  | 13          | 4.2 ± 1.5 | -                      | -         | -           | -         |
| 27  | 12          | 3.9 ± 1.7 | -                      | -         | -           | -         |
| 28  | 12          | 4.0 ± 1.6 | -                      | -         | -           | -         |
