# Supplementary material for: Assessment of the Adherence to ESPGHAN 2018 Guidelines in the Neonatal Intensive Care Unit of the Ghent University Hospital: A Retrospective Study
Source: MDPI journal article supplement (doi:10.3390/nu15102324), 2023-05-16
Supplement: s1 [file s1]

**Table S7.** Parenteral nutrition fraction (v/v%) in the nutrient provision, stratified by birth weight (BW). Data show mean and standard deviation (SD).

| Day | BW < 1000 g |         | BW of 1000 to < 1500 g |         | BW ≥ 1500 g |         |
|-----|-------------|---------|------------------------|---------|-------------|---------|
|     | N           | %       | N                      | %       | N           | %       |
| 1   | 28          | 100 ± 0 | 12                     | 99 ± 2  | 46          | 97 ± 11 |
| 2   | 28          | 100 ± 1 | 12                     | 96 ± 7  | 45          | 94 ± 12 |
| 3   | 28          | 98 ± 3  | 12                     | 93 ± 9  | 41          | 89 ± 13 |
| 4   | 28          | 98 ± 4  | 12                     | 86 ± 16 | 43          | 84 ± 16 |
| 5   | 28          | 96 ± 6  | 12                     | 82 ± 13 | 45          | 77 ± 19 |
| 6   | 28          | 93 ± 9  | 12                     | 77 ± 15 | 43          | 70 ± 22 |
| 7   | 28          | 91 ± 12 | 12                     | 71 ± 17 | 39          | 63 ± 23 |
| 8   | 28          | 89 ± 14 | 12                     | 67 ± 19 | 33          | 59 ± 23 |
| 9   | 28          | 82 ± 23 | 11                     | 59 ± 24 | 28          | 60 ± 23 |
| 10  | 28          | 84 ± 19 | 11                     | 53 ± 26 | 26          | 56 ± 24 |
| 11  | 28          | 80 ± 23 | 11                     | 47 ± 27 | 25          | 54 ± 26 |
| 12  | 28          | 71 ± 31 | 10                     | 45 ± 28 | 21          | 52 ± 28 |
| 13  | 27          | 73 ± 27 | 7                      | 48 ± 30 | 18          | 51 ± 27 |
| 14  | 27          | 69 ± 31 | 6                      | 47 ± 31 | 17          | 45 ± 27 |
| 15  | 23          | 72 ± 30 | 5                      | 46 ± 34 | 10          | 54 ± 26 |
| 16  | 22          | 71 ± 30 | 3                      | 61 ± 37 | 9           | 51 ± 30 |
| 17  | 19          | 74 ± 27 | 3                      | 55 ± 43 | 4           | 66 ± 27 |
| 18  | 18          | 73 ± 25 | -                      | -       | 3           | 70 ± 13 |
| 19  | 18          | 68 ± 29 | -                      | -       | 3           | 64 ± 15 |
| 20  | 17          | 67 ± 27 | -                      | -       | -           | -       |
| 21  | 17          | 62 ± 29 | -                      | -       | -           | -       |
| 22  | 15          | 70 ± 29 | -                      | -       | -           | -       |
| 23  | 15          | 62 ± 30 | -                      | -       | -           | -       |
| 24  | 14          | 61 ± 30 | -                      | -       | -           | -       |
| 25  | 13          | 68 ± 30 | -                      | -       | -           | -       |
| 26  | 13          | 60 ± 30 | -                      | -       | -           | -       |
| 27  | 12          | 63 ± 26 | -                      | -       | -           | -       |
| 28  | 12          | 59 ± 26 | -                      | -       | -           | -       |
