# Supplementary material for: Assessment of the Adherence to ESPGHAN 2018 Guidelines in the Neonatal Intensive Care Unit of the Ghent University Hospital: A Retrospective Study
Source: MDPI journal article supplement (doi:10.3390/nu15102324), 2023-05-16
Supplement: s1 [file s1]

**Table S3.** Carbohydrate provision in neonates stratified by birth weight (BW). Intake data (in g/kg/d) show mean and standard deviation.

| Day | BW < 1000 g |            | BW of 1000 to < 1500 g |            | BW ≥ 1500 g |            |
|-----|-------------|------------|------------------------|------------|-------------|------------|
|     | N           | g/kg/d     | N                      | g/kg/d     | N           | g/kg/d     |
| 1   | 28          | 5.2 ± 2.6  | 12                     | 4.8 ± 3.2  | 46          | 8.1 ± 3.6  |
| 2   | 28          | 8.1 ± 2.0  | 12                     | 8.2 ± 2.2  | 45          | 9.0 ± 2.4  |
| 3   | 28          | 8.7 ± 2.8  | 12                     | 8.6 ± 2.4  | 41          | 10.3 ± 2.3 |
| 4   | 28          | 9.7 ± 3.2  | 12                     | 10.5 ± 3.3 | 43          | 11.1 ± 2.3 |
| 5   | 28          | 11.0 ± 2.9 | 12                     | 11.8 ± 3.0 | 45          | 11.8 ± 2.4 |
| 6   | 28          | 11.2 ± 2.7 | 12                     | 11.6 ± 3.0 | 43          | 12.5 ± 2.3 |
| 7   | 28          | 11.6 ± 2.7 | 12                     | 12.1 ± 2.9 | 39          | 11.9 ± 2.4 |
| 8   | 28          | 11.9 ± 2.4 | 12                     | 11.8 ± 2.7 | 33          | 12.1 ± 2.8 |
| 9   | 28          | 11.3 ± 2.2 | 11                     | 11.7 ± 2.7 | 28          | 11.9 ± 1.8 |
| 10  | 28          | 11.8 ± 2.8 | 11                     | 13.3 ± 3.5 | 26          | 12.5 ± 2.1 |
| 11  | 28          | 12.1 ± 2.5 | 11                     | 13.2 ± 2.5 | 25          | 12.7 ± 2.6 |
| 12  | 28          | 11.3 ± 3.7 | 10                     | 13.7 ± 3.9 | 21          | 12.9 ± 3.2 |
| 13  | 27          | 12.3 ± 3.1 | 7                      | 12.9 ± 3.1 | 18          | 12.8 ± 2.3 |
| 14  | 27          | 12.8 ± 3.9 | 6                      | 13.0 ± 3.6 | 17          | 13.0 ± 1.7 |
| 15  | 23          | 12.4 ± 3.2 | 5                      | 12.3 ± 3.5 | 10          | 12.7 ± 2.1 |
| 16  | 22          | 12.8 ± 3.2 | 3                      | 12.2 ± 4.5 | 9           | 13.1 ± 1.2 |
| 17  | 19          | 12.8 ± 3.3 | -                      | -          | 4           | 13.0 ± 1.4 |
| 18  | 18          | 12.1 ± 2.8 | -                      | -          | 3           | 13.1 ± 1.8 |
| 19  | 18          | 12.1 ± 3.1 | -                      | -          | 3           | 11.5 ± 1.8 |
| 20  | 17          | 13.0 ± 3.2 | -                      | -          | -           | -          |
| 21  | 17          | 13.9 ± 2.4 | -                      | -          | -           | -          |
| 22  | 15          | 14.3 ± 4.2 | -                      | -          | -           | -          |
| 23  | 15          | 13.8 ± 2.1 | -                      | -          | -           | -          |
| 24  | 14          | 13.1 ± 1.9 | -                      | -          | -           | -          |
| 25  | 13          | 13.1 ± 2.6 | -                      | -          | -           | -          |
| 26  | 13          | 13.1 ± 2.1 | -                      | -          | -           | -          |
| 27  | 12          | 13.9 ± 1.4 | -                      | -          | -           | -          |
| 28  | 12          | 13.5 ± 1.4 | -                      | -          | -           | -          |
