# Supplementary material for: Assessment of the Adherence to ESPGHAN 2018 Guidelines in the Neonatal Intensive Care Unit of the Ghent University Hospital: A Retrospective Study
Source: MDPI journal article supplement (doi:10.3390/nu15102324), 2023-05-16
Supplement: s1 [file s1]

**Table S5.** Amino acid provision in neonates stratified by birth weight (BW). Intake data (in g/kg/d) show mean and standard deviation.

| Day | BW < 1000 g |           | BW of 1000 to < 1500 g |           | BW ≥ 1500 g |           |
|-----|-------------|-----------|------------------------|-----------|-------------|-----------|
|     | N           | g/kg/d    | N                      | g/kg/d    | N           | g/kg/d    |
| 1   | 28          | 0.5 ± 0.3 | 12                     | 0.6 ± 0.5 | 46          | 1.2 ± 0.9 |
| 2   | 28          | 1.4 ± 0.4 | 12                     | 1.3 ± 0.7 | 45          | 1.5 ± 0.4 |
| 3   | 28          | 1.8 ± 0.7 | 12                     | 1.6 ± 0.4 | 41          | 1.8 ± 0.4 |
| 4   | 28          | 1.9 ± 0.4 | 12                     | 2.1 ± 1.0 | 43          | 1.9 ± 0.4 |
| 5   | 28          | 2.0 ± 0.5 | 12                     | 2.3 ± 0.6 | 45          | 2.0 ± 0.5 |
| 6   | 28          | 2.0 ± 0.5 | 12                     | 2.3 ± 0.7 | 43          | 2.1 ± 0.5 |
| 7   | 28          | 2.1 ± 0.5 | 12                     | 2.3 ± 0.7 | 39          | 1.9 ± 0.6 |
| 8   | 28          | 2.1 ± 0.5 | 12                     | 2.4 ± 0.7 | 33          | 2.0 ± 0.6 |
| 9   | 28          | 2.1 ± 0.5 | 11                     | 2.4 ± 0.7 | 28          | 2.0 ± 0.6 |
| 10  | 28          | 2.1 ± 0.6 | 11                     | 2.5 ± 0.6 | 26          | 1.9 ± 0.5 |
| 11  | 28          | 2.1 ± 0.6 | 11                     | 2.6 ± 0.5 | 25          | 1.9 ± 0.6 |
| 12  | 28          | 2.1 ± 0.6 | 10                     | 2.6 ± 0.6 | 21          | 2.0 ± 0.5 |
| 13  | 27          | 2.2 ± 0.6 | 7                      | 2.5 ± 0.6 | 18          | 1.9 ± 0.5 |
| 14  | 27          | 2.1 ± 0.6 | 6                      | 2.5 ± 0.8 | 17          | 1.8 ± 0.5 |
| 15  | 23          | 2.2 ± 0.5 | 5                      | 2.5 ± 0.9 | 10          | 1.8 ± 0.5 |
| 16  | 22          | 2.1 ± 0.6 | 3                      | 2.1 ± 0.7 | 9           | 2.0 ± 0.6 |
| 17  | 19          | 2.2 ± 0.6 | 3                      | 2.1 ± 0.9 | 4           | 2.1 ± 0.6 |
| 18  | 18          | 2.1 ± 0.5 | -                      | -         | 3           | 2.1 ± 0.5 |
| 19  | 18          | 2.1 ± 0.5 | -                      | -         | 3           | 2.1 ± 0.3 |
| 20  | 17          | 2.2 ± 0.6 | -                      | -         | -           | -         |
| 21  | 17          | 2.6 ± 0.6 | -                      | -         | -           | -         |
| 22  | 15          | 2.5 ± 0.8 | -                      | -         | -           | -         |
| 23  | 15          | 2.5 ± 0.7 | -                      | -         | -           | -         |
| 24  | 14          | 2.5 ± 0.6 | -                      | -         | -           | -         |
| 25  | 13          | 2.3 ± 0.6 | -                      | -         | -           | -         |
| 26  | 13          | 2.5 ± 0.6 | -                      | -         | -           | -         |
| 27  | 12          | 2.5 ± 0.5 | -                      | -         | -           | -         |
| 28  | 12          | 2.7 ± 0.7 | -                      | -         | -           | -         |
