# Supplementary material for: Assessment of the Adherence to ESPGHAN 2018 Guidelines in the Neonatal Intensive Care Unit of the Ghent University Hospital: A Retrospective Study
Source: MDPI journal article supplement (doi:10.3390/nu15102324), 2023-05-16
Supplement: s1 [file s1]

**Table S2.** Summary of weekly changes of Z-scores for age. Calculation based on Fenton growth charts [1]. Min minimum, Q25 first quartile, Q75 third quartile, Max maximum, SD standard deviation.

| Weekly Fenton Z-score change | Birth weight (g) | Min   | Q25   | Median | Q75  | Max  | Mean | SD   |
|------------------------------|------------------|-------|-------|--------|------|------|------|------|
| Weight                       | <1000            | -0.06 | 0.12  | 0.23   | 0.29 | 0.40 | 0.21 | 0.12 |
| Length                       | <1000            | 0.00  | 0.15  | 0.18   | 0.31 | 0.49 | 0.22 | 0.13 |
| Head circumference           | <1000            | 0.00  | 0.15  | 0.30   | 0.39 | 0.66 | 0.29 | 0.18 |
| Weight                       | 1000 to <1500    | -0.19 | -0.06 | 0.07   | 0.15 | 0.33 | 0.07 | 0.16 |
| Length                       | 1000 to <1500    | 0.00  | 0.10  | 0.22   | 0.37 | 0.47 | 0.23 | 0.16 |
| Head circumference           | 1000 to <1500    | -1.14 | 0.00  | 0.27   | 0.43 | 1.07 | 0.21 | 0.52 |
| Weight                       | ≥1500            | -0.53 | -0.01 | 0.09   | 0.22 | 1.32 | 0.10 | 0.31 |
| Length                       | ≥1500            | 0.00  | 0.16  | 0.28   | 0.44 | 1.21 | 0.33 | 0.27 |
| Head circumference           | ≥1500            | 0.00  | 0.08  | 0.26   | 0.48 | 1.18 | 0.33 | 0.31 |

## References

- 1 Fenton TR, Kim JH. A systematic review and meta-analysis to revise the Fenton growth chart for preterm infants. *BMC Pediatr* 2013;13:59. doi:10.1186/1471-2431-13-59.
