# Supplementary material for: Assessment of the Adherence to ESPGHAN 2018 Guidelines in the Neonatal Intensive Care Unit of the Ghent University Hospital: A Retrospective Study
Source: MDPI journal article supplement (doi:10.3390/nu15102324), 2023-05-16
Supplement: s1 [file s1]

**Table S1.** Patient growth parameters at birth and median time from birth to parenteral nutrition (PN), stratified by birth weight (BW). SD standard deviation, IQR interquartile range.

| Parameter                                 | Overall        | BW < 1000 g   | BW of 1000 to < 1500 g | BW ≥ 1500 g    |
|-------------------------------------------|----------------|---------------|------------------------|----------------|
| Birth weight, g, mean ± SD                | 1659.9 ± 884.3 | 792.8 ± 107.4 | 1287.7 ± 161.2         | 2284.8 ± 748.2 |
| Birth length, cm, mean ± SD               | 40.6 ± 6       | 33.8 ± 2      | 38.6 ± 1.2             | 45.2 ± 3.7     |
| Birth head circumference, cm, mean ± SD   | 28.1 ± 4       | 23.6 ± 1.6    | 27 ± 1.1               | 31.1 ± 2.6     |
| Time from birth to PN, days, median (IQR) | 0.0 (0.0–0.0)  | 0 (0.0–0.0)   | 0.0 (0.0–0.0)          | 0.0 (0.0–1.8)  |
